# Supplementary material
Source: bioRxiv or medRxiv preprint supplement (https://www.biorxiv.org/highwire/filestream/79748/field_highwire_adjunct_files/0/260216-1.pdf)
Supplement: Supplementary file [file 260216-1.pdf]

| Cultures                                                    | Glucose concentration (mM) | Glucose utilization (%) | H <sub>2</sub> production (mM) | H <sub>2</sub> yield (mol / mol glucose <sub>consumed</sub> ) |
|-------------------------------------------------------------|----------------------------|-------------------------|--------------------------------|---------------------------------------------------------------|
| <i>C. butyricum</i> in anaerobic JM medium                  |                            |                         |                                |                                                               |
|                                                             | 0                          | -                       | -                              | -                                                             |
|                                                             | 10                         | 100                     | 21.4±0.6                       | 2.1±0.1                                                       |
|                                                             | 20                         | 70.0±1.0                | 36.5±0.1                       | 1.8±0.0                                                       |
|                                                             | 50                         | 38.0±2.0                | 37.7±4.0                       | 0.8±0.1                                                       |
| <i>ADP1-g – C. butyricum</i> coculture in aerobic JM medium |                            |                         |                                |                                                               |
|                                                             | 0                          | -                       | -                              | -                                                             |
|                                                             | 10                         | 100                     | 13.0±0.2                       | 1.3±0.0                                                       |
|                                                             | 20                         | 100                     | 47.0±1.4                       | 2.4±0.1                                                       |
|                                                             | 50                         | 84.0±2.0                | 59.5±3.2                       | 1.2±0.1                                                       |

Additional file 1: **Table S1. Substrate utilization and H<sub>2</sub> production profiles from *C. butyricum* and ADP1-g – *C. butyricum* coculture grown in 10ml JM medium supplemented with glucose and 10 mM acetate.** Data represents the average from triplicate experimental repeats ± standard deviation.
